# Supplementary material for: Nanosheets of two-dimensional photoluminescent lanthanide phosphonocarboxylate frameworks decorated with free carboxylic groups for latent fingerprint imaging
Source: Royal Society of Chemistry journal article supplement (doi:10.1039/d3dt01173a), 2023-01-01
Supplement: d3dt01173a1.pdf [file d3dt01173a1.pdf]

Electronic Supplementary Information for

**Nanosheets of two-dimensional photoluminescent Lanthanide  
phosphonocarboxylate frameworks decorated with free  
carboxylic groups for latent fingerprint imaging**

Dan Luo, Hongjie He, Huiru Jing, Yun Ling, Yu Jia, Yongtai Yang, Xiaofeng Liu,  
Zhenxia Chen\* and Mingli Deng\*

Shanghai Key Laboratory of Molecular Catalysis and Innovative Materials, Department  
of Chemistry, Fudan University, Shanghai, 200433, China.

E-mail: [zhxchen@fudan.edu.cn](mailto:zhxchen@fudan.edu.cn). (Prof. Dr. Chen Z.X.); [mldeng@fudan.edu.cn](mailto:mldeng@fudan.edu.cn) (Prof.  
Dr. Deng M.L.)

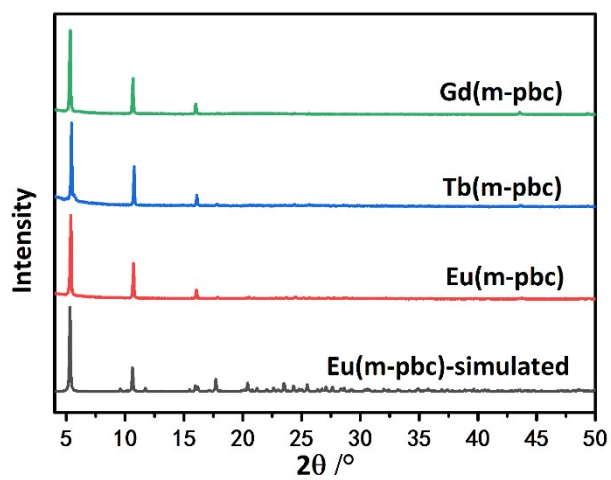

**Figure S1. PXRD patterns of Gd(m-pbc), Tb(m-pbc), Eu(m-pbc) and simulated.**

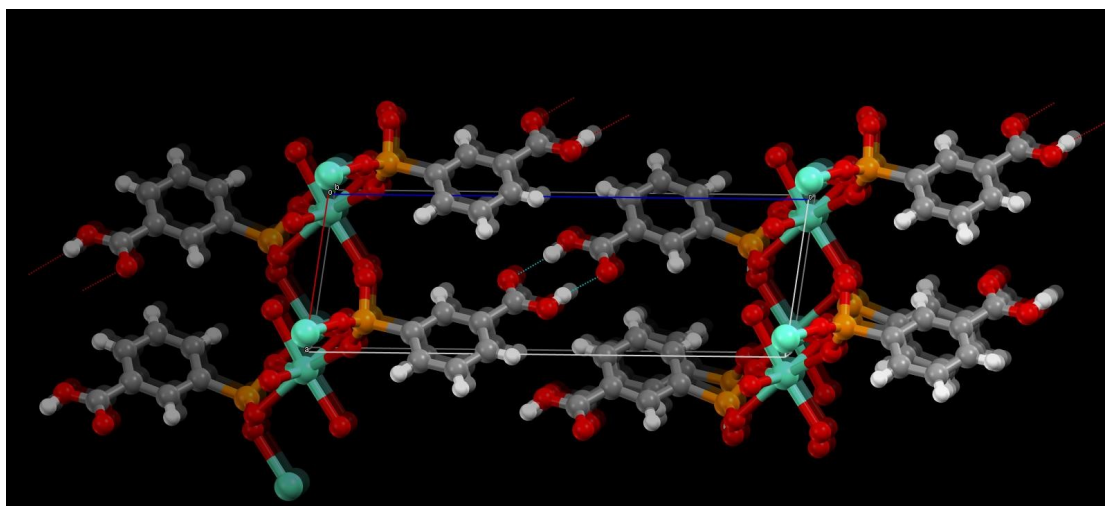

**Figure S2.** Structure of **Eu(m-bpc)** viewing along *b* axis, showing the hydrogen bonds between layers.

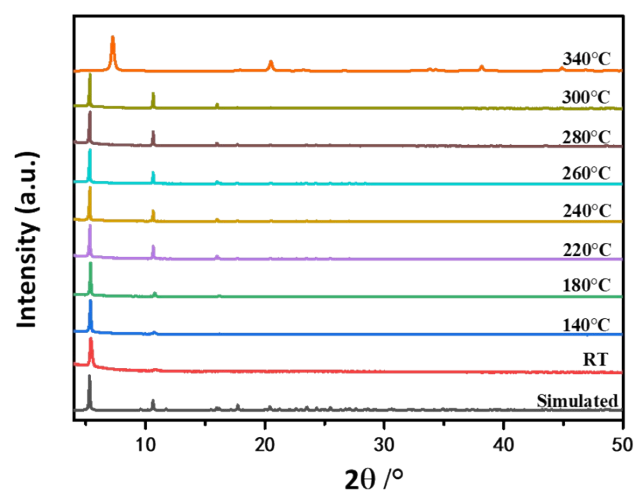

**Figure S3.** PXRD patterns of **Eu(m-pbc)** calcined at varied temperature.

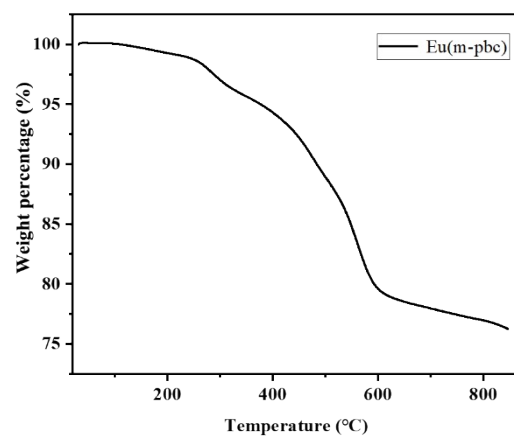

**Figure S4.** TGA curve of **Eu(m-pbc)**.

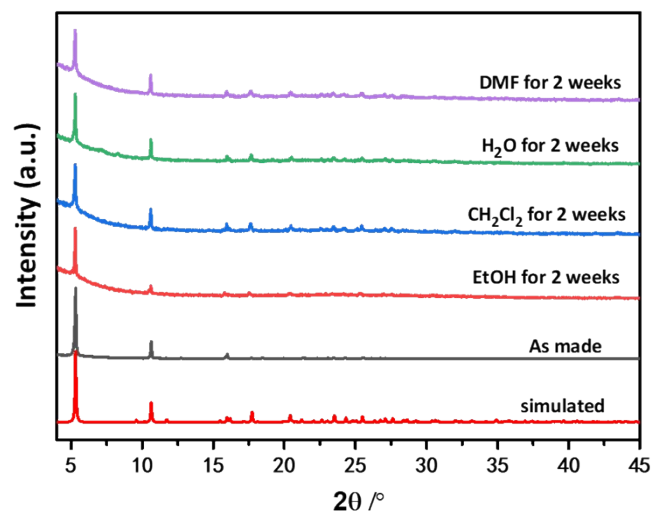

**Figure S5.** PXRD patterns of simulated, as-made and **Eu(m-pbc)** after immersing in different solvents for two weeks.

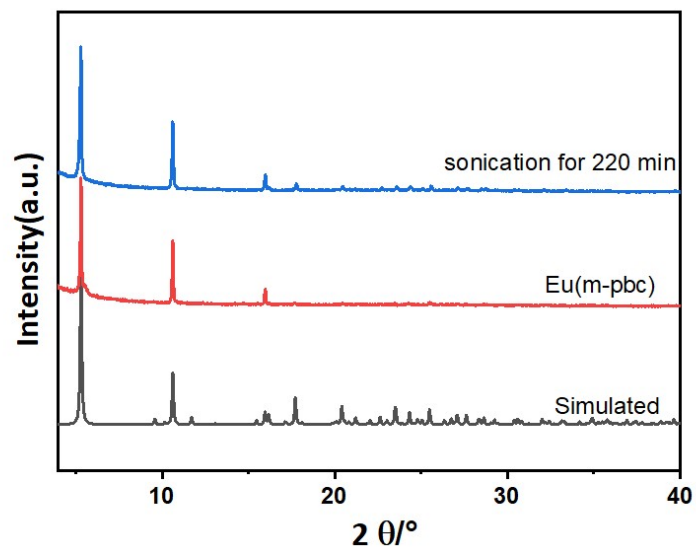

**Figure S6.** PXRD patterns of **Eu(m-pbc)**: simulated, as-made and after sonicating for 220 min.

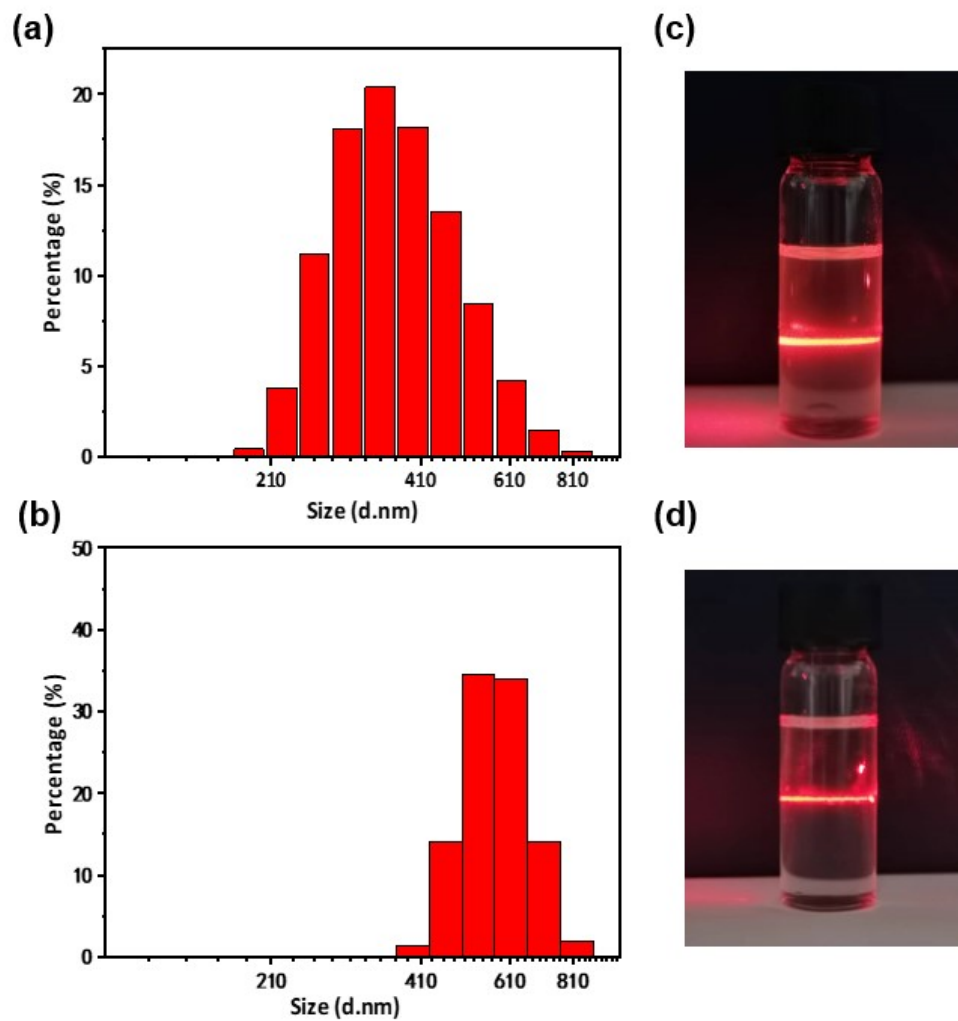

**Figure S7.** Hydrodynamic diameter distributions of suspensions of in EtOH, (a) **Eu(m-pbc)-NS** (b) **Tb(m-pbc)-NS**, (c) and (d) Tyndall effect for the suspension of in EtOH.



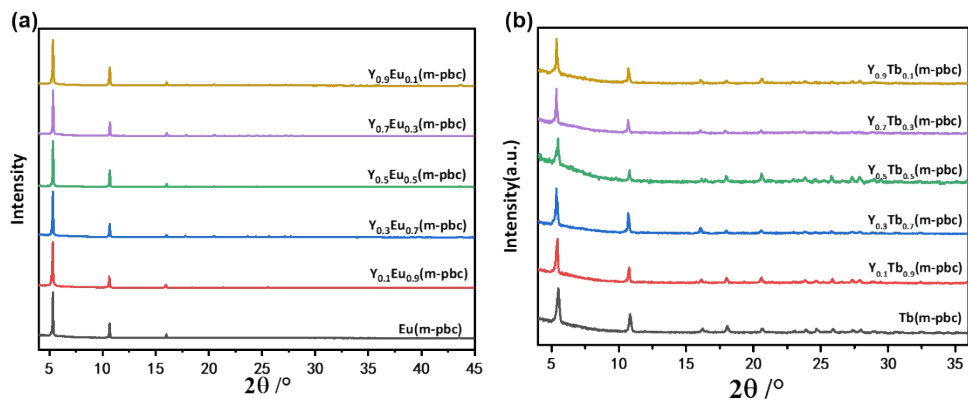

**Figure S8.** PXRD patterns of (a)  $Y_xEu_{1-x}(m-pbc)$  and (b)  $Y_xTb_{1-x}(m-pbc)$  ( $x=10\%$ ,  $30\%$ ,  $50\%$ ,  $70\%$ ,  $90\%$ ).

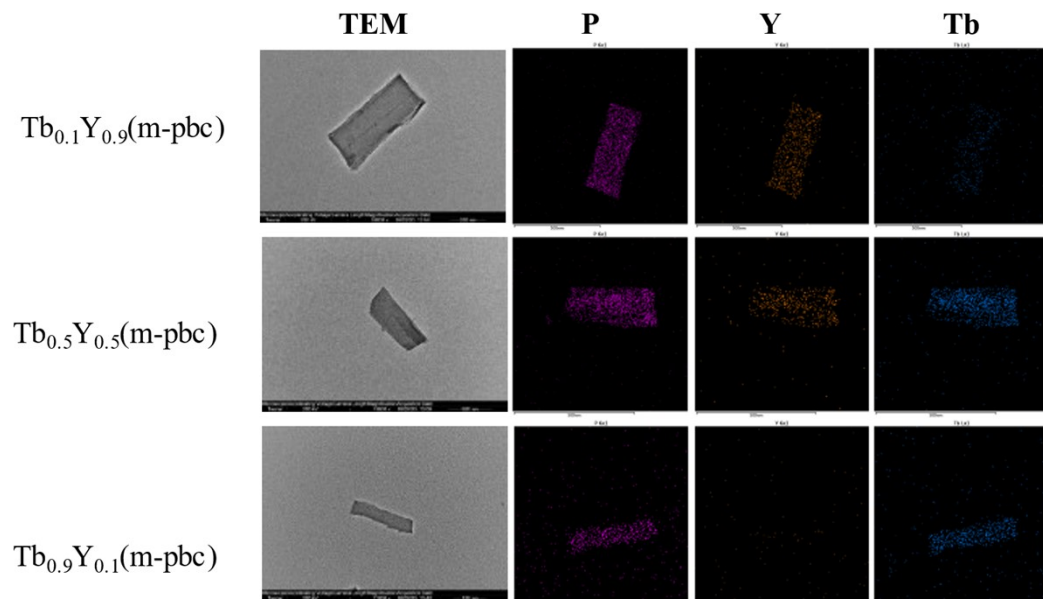

**Figure S9.** The TEM images and elemental mapping of  $Tb_xY_{1-x}(m-pbc)$  ( $x= 10\%$ ,  $50\%$ ,  $90\%$ ).

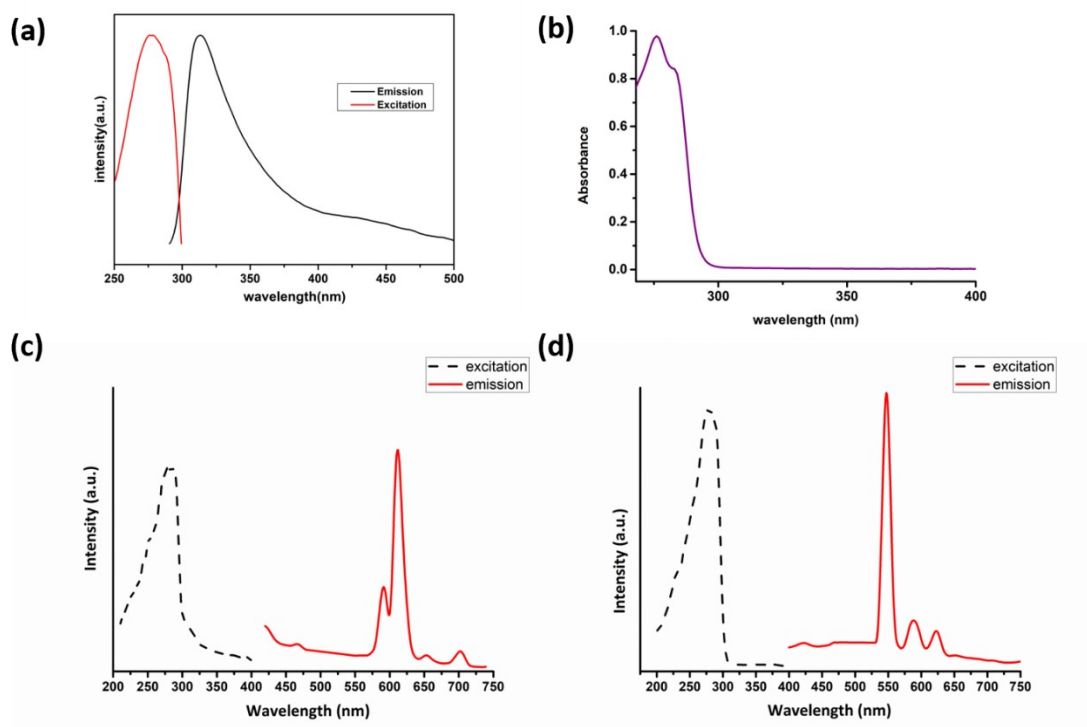

**Figure S10.** (a) Excitation and emission spectra of m-H<sub>3</sub>pbc, (b) UV-vis absorption spectrum of m-H<sub>3</sub>pbc, (c) (d) Excitation and emission spectra of Eu(m-bpc) and Tb(m-bpc) in solid state at room temperature.

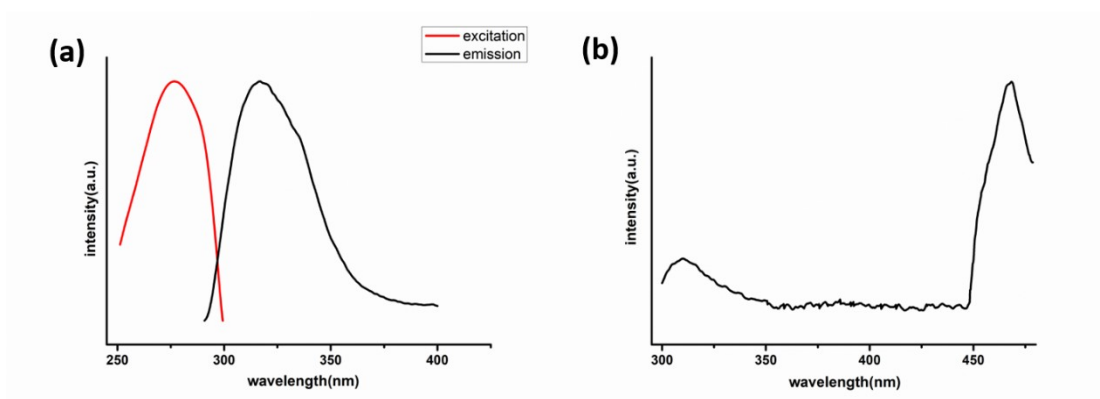

**Figure S11.** (a) Excitation and emission spectra of **Gd(m-bpc)** in solid state at room temperature, (b) Emission spectrum of **Gd(m-bpc)** at 77 K.

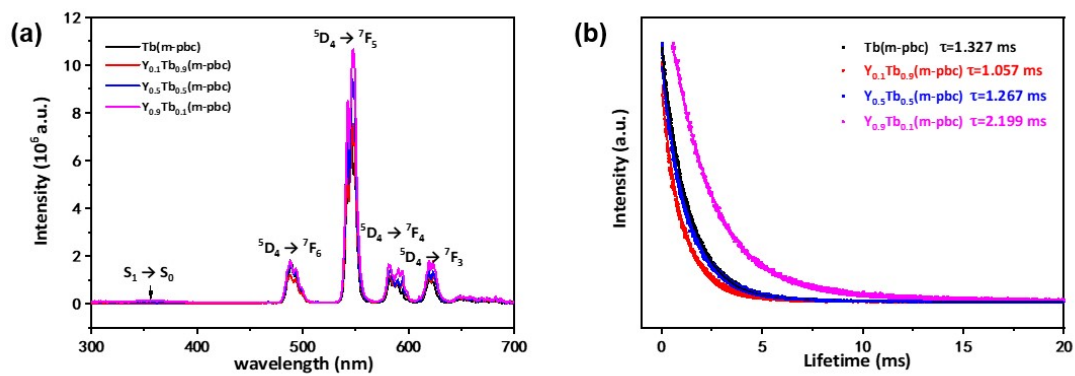

**Figure S12.** (a) **Emission** spectra ( $\lambda_{exc} = 254$  nm) of  $Y_xTb_{1-x}(m-bpc)$ , (b) Temporal decay curves of the  $Y_xTb_{1-x}(m-bpc)$ , ( $x=10\%$ ,  $50\%$ ,  $90\%$ ), monitored at 545 nm ( ${}^5D_4 \rightarrow {}^7F_5$  of  $Tb^{3+}$ )

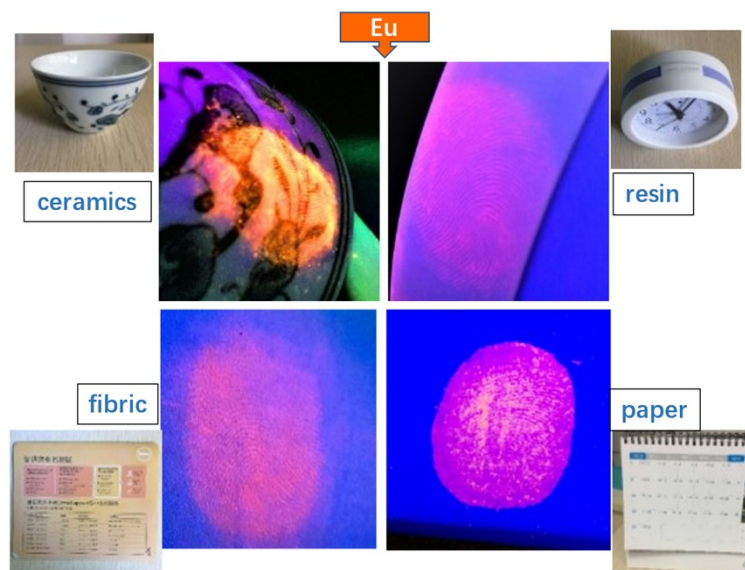

**Figure S13.** Luminescent images of fingerprints on some daily substrates (ceramics, resin, fabric and paper) treated with  $Y_{0.9}Eu_{0.1}(m-pbc)$ -NS.

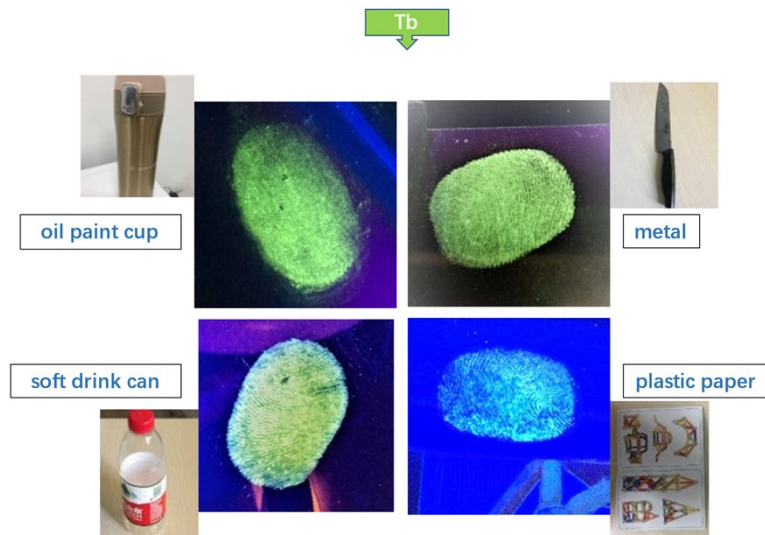

**Figure S14.** Luminescent images of fingerprints on some daily substrates (oil paint cup, metal, soft drink can and plastic paper) treated with  $Y_{0.9}Tb_{0.1}(m-pbc)$ -NS.

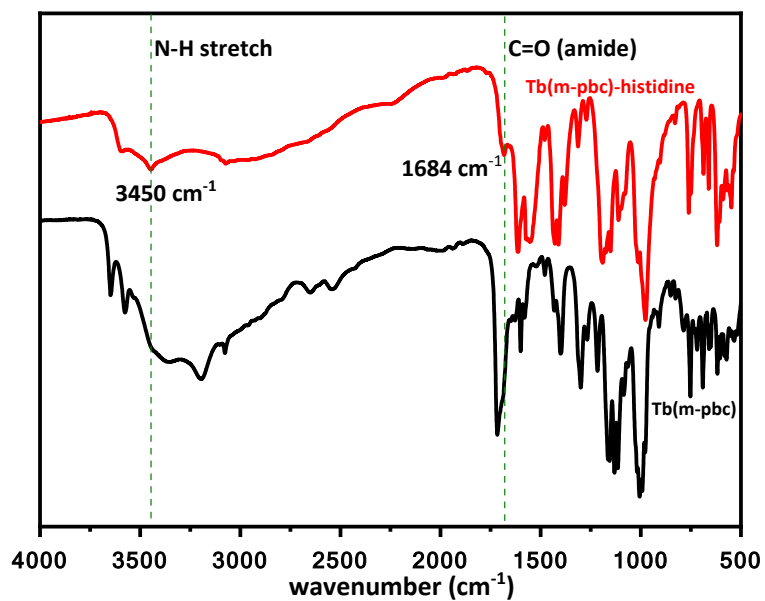

**Figure S15.** FT-IR spectra of **Tb(m-pbc)-NS** and **Tb(m-pbc)-NS** treated by EDC/NHS then reacted with histidine.



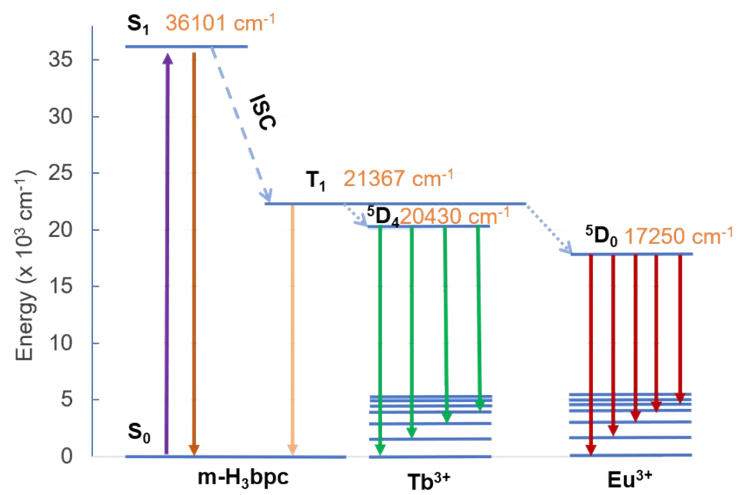

**Scheme S1.** The schematic emission and “antenna effect” processed in Ln(m-pbc).

**Table S1.** Hydrogen bonds for **Eu(m-pbc)** [ $\text{\AA}$  and  $^\circ$ ].

| D-H...A               | d(D-H) | d(H...A) | d(D...A) | <(DHA) |
|-----------------------|--------|----------|----------|--------|
| O(5)-H(5)...O(10)#4   | 0.82   | 2.10     | 2.661(7) | 125.2  |
| O(6)-H(6A)...O(1)#5   | 0.85   | 1.82     | 2.653(5) | 166.9  |
| O(6)-H(6B)...O(9)#6   | 0.84   | 2.07     | 2.870(6) | 158.8  |
| O(9)-H(9A)...O(3)#3   | 0.82   | 1.87     | 2.685(5) | 172.5  |
| O(11)-H(11A)...O(4)#7 | 0.82   | 1.84     | 2.642(7) | 166.8  |
| C(5)-H(5A)...O(7)#3   | 0.93   | 2.54     | 3.303(7) | 139.4  |
| C(12)-H(12)...O(6)#1  | 0.93   | 2.47     | 3.386(7) | 167.9  |

Symmetry transformations used to generate equivalent atoms:

#1  $-x+2, -y, -z+2$     #2  $-x+3, -y+1, -z+2$     #3  $-x+2, -y+1, -z+2$   
#4  $x+1, y, z-1$     #5  $x-1, y, z$     #6  $-x+1, -y, -z+2$     #7  $x-1, y, z+1$

**Table S2.** ICP results and calculated molar contents of Y and Eu/Tb in  $Y_xEu_{1-x}(\text{m-pbc})$  and  $Y_xTb_{1-x}(\text{m-pbc})$  ( $x= 10\%, 30\%, 50\%, 70\%, 90\%$ ).

| Sample                       | Element | Reported Conc (mg/L) | Real molar content (%) |
|------------------------------|---------|----------------------|------------------------|
| $Y_{0.1}Eu_{0.9}\text{-pbc}$ | Y       | 4.51                 | 9.44                   |
|                              | Eu      | 73.9                 | 90.56                  |
| $Y_{0.3}Eu_{0.7}\text{-pbc}$ | Y       | 10.86                | 31.20                  |
|                              | Eu      | 40.96                | 68.80                  |
| $Y_{0.5}Eu_{0.5}\text{-pbc}$ | Y       | 14.97                | 57.72                  |
|                              | Eu      | 19.53                | 42.28                  |
| $Y_{0.7}Eu_{0.3}\text{-pbc}$ | Y       | 12.54                | 72.64                  |
|                              | Eu      | 8.072                | 27.36                  |
| $Y_{0.9}Eu_{0.1}\text{-pbc}$ | Y       | 30.41                | 90.84                  |
|                              | Eu      | 5.237                | 9.16                   |
| $Y_{0.1}Tb_{0.9}\text{-pbc}$ | Y       | 3.092                | 12.35                  |
|                              | Tb      | 39.25                | 87.65                  |
| $Y_{0.3}Tb_{0.7}\text{-pbc}$ | Y       | 7.828                | 32.57                  |
|                              | Tb      | 28.96                | 67.43                  |
| $Y_{0.5}Tb_{0.5}\text{-pbc}$ | Y       | 14.16                | 50.11                  |
|                              | Tb      | 25.21                | 49.89                  |
| $Y_{0.7}Tb_{0.3}\text{-pbc}$ | Y       | 20.37                | 71.55                  |
|                              | Tb      | 14.48                | 28.45                  |
| $Y_{0.9}Tb_{0.1}\text{-pbc}$ | Y       | 30.56                | 85.63                  |
|                              | Tb      | 5.126                | 14.37                  |
